# Supplementary material for: Comparison of induced neurons reveals slower structural and functional maturation in humans than in apes
Source: eLife. 2021 Jan 20;10:e59323. doi: 10.7554/eLife.59323 (PMC7870144; doi:10.7554/eLife.59323)
Supplement: Supplementary file 5. [file elife-59323-supp5.xlsx]

## Sheet: scRNAseq
species	timepoint	cell_line	batch	cell_numbers
human	d5	409B2	171212	685
human	d5	409B2	180904	679
chimpanzee	d5	SandraA	171212	412
chimpanzee	d5	SandraA	190327	461
human	d14	409B2	171212	1124
chimpanzee	d14	BmRNA	200920	187
human	d14	H9	200920	362
chimpanzee	d14	JoC	200920	217
chimpanzee	d14	SandraA	171212	260
chimpanzee	d14	SandraA	190327	195
human	d14	SC102A1	200920	775
human	d28	409B2	171122	89
human	d28	409B2	180321	3800
human	d28	409B2	170921	444
chimpanzee	d28	SandraA	171122	104
chimpanzee	d28	SandraA	180321	216
human	d35	409B2	180221	698
human	d35	409B2	180410	1105
chimpanzee	d35	BmRNA	200818	90
chimpanzee	d35	BmRNA	200908	674
human	d35	H9	180410	339
human	d35	H9	200818	187
chimpanzee	d35	SandraA	180221	253
chimpanzee	d35	SandraA	190507_1	120
chimpanzee	d35	SandraA	190507_1	286
chimpanzee	d35	SandraA	190507_3	98
chimpanzee	d35	SandraA	190507_4	42
human	d35	SC102A1	180410	739
human	d35	SC102A1	200818	1452
chimpanzee	d35	JoC	200818	15
chimpanzee	d35	JoC	200908	83

## Sheet: Ephys
species	cell_line	batch/start of culture	timepoint of recordings	cell_numbers
Bonobo	BmRNA_Ngn2	20180228	d14-16	2
			d20-24	3
			d27-31	4
			d34-36	2
			total	11
Chimpanzee	JoC_Ngn2	20170823	d14-16	1
			d20-24	2
			d27-31	6
			d34-36	4
			d>49	5
			total	18
		20180228	d14-16	3
			d20-24	3
			d27-31	3
			d34-36	3
			total	12
	SandraA_Ngn2	20170418	d20-24	8
			d>49	1
			total	9
		20170518	d27-31	4
		20170606	d20-24	5
			d27-31	5
			total	10
		20170823	d14-d16	2
			d20-24	2
			d27-31	2
			d34-36	5
			d>49	5
			total	16
		20180228	d14-d16	2
			d20-24	2
			d27-31	1
			d34-36	3
			total	8
		20180509	d20-24	3
		20181023	d20-24	3
			d34-36	3
			d>49	2
			total	8
		20181113	d20-24	3
	ciPSC01_Ngn2	20181023	d20-24	2
			d34-36	3
			d>49	2
			total	7
		20181030	d20-24	3
Human	H9_Ngn2	20180301	d>49	3
		20180228	d14-16	4
			d20-24	2
			d27-31	3
			d34-36	3
			total	12
	hiPS-409-B2_Ngn2	20170418	d20-24	4
			d27-31	4
			d>49	2
			total	10
		20170606	d20-24	4
			d27-31	7
			total	11
		20170823	d14-16	2
			d20-24	5
			d27-31	7
			d34-36	7
			d>49	6
			total	27
		20180301	d>49	3
		20180228	d14-16	4
			d20-24	3
			d27-31	2
			d34-36	3
			total	12
		20180509	d20-24	3
		20181023	d34-36	3
			d>49	2
			total	5
		20181030	d20-24	1
	SC102A1_Ngn2	20180103	d>49	4
		20180228	d14-16	3
			d20-24	3
			d27-31	4
			d34-36	4
			total	14
		20180509	d20-24	6
	hmRNA_Ngn2	20181023	d20-24	3
			d34-36	3
			total	6
		20183010	d20-24	2
Human	H9_Ngn2	20200820	d2-4	12
	hiPS-409-B2_Ngn2	20200915	d6-8	15
	SC102A1_Ngn2	20201007	d9-10	10
Ape	BmRNA_Ngn2	20200820	d2-4	8
	SandraA_Ngn2	20200915	d6-8	16
	JoC_Ngn2	20201007	d9-10	8

## Sheet: Morphology
species	cell_line	batch/start of culture	timepoint of recordings	cell_numbers
Human	H9_Ngn2	20180828	d7	8
		20190406		12
		20190521		32
		20171207	d14	19
		20180424		11
		20171023	d21	5
		20171207		13
		20180109		5
		20180424		3
		20180522		19
		20180529		3
		20180828		9
		20180828	d35	3
	hiPS-409-B2_Ngn2	20171128	d7	26
		20171207		8
		20180424		9
		20180522		17
		20180529		16
		20171207	d14	1
		20171219		5
		20180410		8
		20180424		5
		20180522		15
		20171023	d21	2
		20171128		7
		20171207		5
		20171209		10
		20180424		7
		20180522		1
		20180529		7
		20171128	d35	1
		20180828		3
		20190406		12
	SC102A1_Ngn2	20180424	d7	32
		20180522		17
		20180529		20
		20171207	d14	7
		20180410		2
		20180424		9
		20180522		5
		20171128	d21	4
		20171207		9
		20171219		2
		20180109		4
		20180424		5
		20180522		5
		20180828	d35	3
		20180904		2
		20190406		9
Chimpanzee	SandraA_Ngn2	20171128	d7	23
		20171207		14
		20180424		11
		20180522		9
		20180529		3
		20171207	d14	6
		20180410		6
		20180424		13
		20180529		2
		20171023	d21	4
		20171128		5
		20171219		10
		20180109		7
		20180424		2
		20180522		3
		20180529		6
		20171128	d35	2
		20180904		8
		20190406		20
	JoC_Ngn2	20180522	d7	2
		20180529		10
		20190406		1
		20171207	d14	11
		20171219		13
		20180410		11
		20180424		4
		20171023	d21	6
		20171128		7
		20171219		8
		20180109		10
		20171128	d35	2
		20180828		2
		20180904		2
		20190406		5
Bonobo	BmRNA_Ngn2	20180828	d7	14
		20190406		4
		20171207	d14	10
		20180424		9
		20180522		15
		20171128	d21	2
		20171207		8
		20180109		18
		20180424		1
		20180522		3
		20180529		2
		20180828		5
		20171128	d35	2
		20180828		2
		20180904		6
