# Supplementary material for: Comparison of induced neurons reveals slower structural and functional maturation in humans than in apes
Source: eLife. 2021 Jan 20;10:e59323. doi: 10.7554/eLife.59323 (PMC7870144; doi:10.7554/eLife.59323)
Supplement: Supplementary file 6. [file elife-59323-supp6.xlsx]

## Sheet: Brn2_ISL1
d21_409b2
							%
File name	DAPI	Brn2	ISL1	Brn2+/ISL1+		Brn2+	ISL1+	Brn2+/ISL1+	Brn2-/ISL1-
d21_409B2_I.lsm	36	15	19	12		41.6667	52.7778	33.3333	38.8889
d21_409B2_II.lsm	24	10	12	7		41.6667	50	29.1667	37.5
d21_409B2_III.lsm	29	11	20	4		37.931	68.9655	13.7931	6.89655
d21_409B2_IV.lsm	21	9	19	7		42.8571	90.4762	33.3333	0
d21_409B2_V.lsm	20	13	13	8		65	65	40	10		SUMMARY_409B2
d21_409B2_VI.lsm	29	10	21	7		34.4828	72.4138	24.1379	17.2414		Brn2+	ISL1+	Brn2+/ISL1+	Brn2-/ISL1-
					average	43.934	66.6055	28.9607	18.4211		43.934	66.6055	28.9607	18.4211
					st dev	10.7757	14.6877	9.09355	16.2935
					sem	4.39916	5.99623	3.71243	6.6518
											14.9733	37.6448	28.9607	18.42
																	SUMMARY-d21
d21_SandraA							%										Brn2+	Brn2+/ISL1+	ISL1+	Brn2-/ISL1-
File name	DAPI	Brn2	ISL1	Brn2+/ISL1+		Brn2+	ISL1+	Brn2+/ISL1+	Brn2-/ISL1-							409b2	43.934	28.9607	66.6055	18.4211
SandraA_d21.lsm	12	5	9	4		41.6667	75	33.3333	16.6667							SandraA	50.7269	30.2267	57.2619	22.2379
	22	14	12	10		63.6364	54.5455	45.4545	27.2727
	21	9	13	5		42.8571	61.9048	23.8095	19.0476
	9	4	5	2		44.4444	55.5556	22.2222	22.2222
	15	7	13	6		46.6667	86.6667	40	6.66667
	10	6	5	2		60	50	20	10
	20	10	13	7		50	65	35	20
	16	14	8	7		87.5	50	43.75	6.25
	29	14	15	8		48.2759	51.7241	27.5862	27.5862
	9	2	2	1		22.2222	22.2222	11.1111	66.6667
											SUMMARY_SandraA
											Brn2+	ISL1+	Brn2+/ISL1+	Brn2-/ISL1-
					average	50.7269	57.2619	30.2267	22.2379		50.7269	57.2619	30.2267	22.2379
					st dev	17.0748	17.1105	11.18	17.3907		16.0413	18.1078	9.55852	7.03223
					sem	5.39952	5.41081	3.53543	5.49943
											Tukey post-hoc test for pairwise comparison
											d21	Species	p adj
											BRN2	Human-Ape	0.3993
											ISL1	Human-Ape	0.2852
											BRN+ISL1+	Human-Ape	0.818
d35_409B2							%
File name	DAPI	Brn2	ISL1	Brn2+/ISL1+		Brn2+	ISL1+	Brn2+/ISL1+	Brn2-/ISL1-		d35	Species	p adj
	10	8	8	7		80	80	70	10		BRN2	Human-Ape	0.355
	23	15	14	12		65.2174	60.8696	52.1739	26.087		ISL1	Human-Ape	0.961
	11	11	10	9							BRN+ISL1+	Human-Ape	0.341
	16	12	12	10		75	75	62.5	12.5
	13	8	6	6		61.5385	46.1538	46.1538	38.4615
	17	9	9	6		52.9412	52.9412	35.2941	29.4118
	19	9	14	5		47.3684	73.6842	26.3158	5.26316
	11	3	2	1		27.2727	18.1818	9.09091	63.6364
	14	9	7	6		64.2857	50	42.8571	28.5714
	17	4	11	4		23.5294	64.7059	23.5294	35.2941
	16	8	12	6		50	75	37.5	12.5
	21	11	18	10		52.381	85.7143	47.619	9.52381
					average	54.5031	64.7748	48.7396	20.2872
					st dev	17.6329	19.4079	17.5653	17.2587
					sem	5.09018	5.60259	5.07067	4.98216
d35_SandraA							%
File name	DAPI	Brn2	ISL1	Brn2+/ISL1+		Brn2+	ISL1+	Brn2+/ISL1+	Brn2-/ISL1-
	6	2	4	2		33.3333	66.6667	33.3333	33.3333
	7	2	4	1		28.5714	57.1429	14.2857	28.5714
	5	3	3	2		60	60	40	20
	4	3	2	2		75	50	50	25								SUMMARY-d35
	27	16	16	10		59.2593	59.2593	37.037	18.5185								Brn2+	ISL1+	Brn2+/ISL1+	Brn2-/ISL1-
	3	2	2	1		66.6667	66.6667	33.3333	0							409B2	54.5031	64.7748	48.7396	20.2872
	12	7	6	5		58.3333	50	41.6667	33.3333							SandraA	56.7364	60.3078	36.8888	19.8446
	11	8	8	5		72.7273	72.7273	45.4545	0
					average	56.7364	60.3078	36.8888	19.8446
					st dev	17.1064	8.09609	10.7835	13.3952
					sem	6.04804	2.8624	3.81254	4.73593

## Sheet: NAV1.7
Label	Line	Mean	StdDev	Species	Precentage
Tuj	hiPS-409B2	43672937	61056320	Human	100
Nav	hiPS-409B2	23407674	38943505	Human	53.6
Tuj	hiPS-409B2	32126068	41198350	Human	100
Nav	hiPS-409B2	18006728	22126010	Human	56.05
Tuj	hiPS-409B2	80612731	77032785	Human	100
Nav	hiPS-409B2	36076895	48247019	Human	44.75
Tuj	hiPS-409B2	69445105	70268363	Human	100
Nav	hiPS-409B2	33538262	42034640	Human	48.29
Tuj	hiPS-409B2	51744098	54925816	Human	100
Nav	hiPS-409B2	25073982	32643377	Human	48.46
Tuj	SandraA	63062767	71346871	Ape	100
Nav	SandraA	32428618	39734063	Ape	51.42
Tuj	SandraA	93032308	83684696	Ape	100
Nav	SandraA	49795378	53378643	Ape	53.52
Tuj	SandraA	93461638	76740869	Ape	100
Nav	SandraA	49931351	47250116	Ape	53.42
Tuj	SandraA	49668449	59406287	Ape	100
Nav	SandraA	23881604	35536560	Ape	48.08
Tuj	SandraA	64713450	72447014	Ape	100
Nav	SandraA	37494669	45524588	Ape	57.94
Tuj	SC102A1	69825100	49123873	Human	100
Nav	SC102A1	39806464	35297859	Human	57.01
Tuj	SC102A1	77259571	54227854	Human	100
Nav	SC102A1	35736811	36647554	Human	46.26
Tuj	SC102A1	80597906	49746215	Human	100
Nav	SC102A1	53870904	46152900	Human	66.84
Tuj	SC102A1	76160790	52848382	Human	100
Nav	SC102A1	37575418	28318488	Human	49.34
Tuj	SC102A1	95892889	79335277	Human	100
Nav	SC102A1	33450563	32521826	Human	34.88
Tuj	BmRNA	51573394	83421408	Ape	100
Nav	BmRNA	16467372	19238619	Ape	31.93
Tuj	BmRNA	63044747	92298415	Ape	100
Nav	BmRNA	18964285	23065248	Ape	30.08
Tuj	BmRNA	64869531	84357167	Ape	100
Nav	BmRNA	18159727	21397679	Ape	27.99
Tuj	BmRNA	35018083	49595676	Ape	100
Nav	BmRNA	20185089	16492970	Ape	57.64
Tuj	BmRNA	70789046	88972630	Ape	100
Nav	BmRNA	24931883	26228677	Ape	35.22
Tuj	BmRNA	75458431	62244400	Ape	100
Nav	BmRNA	13825093	10646830	Ape	18.32
Tukey post-hoc test for pairwise comparison
	diff	lwr	upr	p adj
Human-Ape	41122	-128534	220778	0.6462

## Sheet: Cux1_Brn2
d21_409b2
							%
File name	DAPI	Cux1	Brn2	Brn2+/Cux1		Cux1	Brn2	Brn2+/Cux1+		Cux1+/Brn2+
409B2_d21_II.czi	14	11	5	3		78.5714	35.7143	21.4286		60
409B2_d21_III.czi	12	12	6	5		100	50	41.6667		83.3333
409B2_d21_IV.czi	17	15	7	5		88.2353	41.1765	29.4118		71.4286
409B2_d21_IX.czi	16	15	3	3		93.75	18.75	18.75		100
409B2_d21_V.czi	6	5	4	4		83.3333	66.6667	66.6667		100
409B2_d21_VI.czi	10	9	6	6		90	60	60		100
409B2_d21_VII.czi	14	13	6	6		92.8571	42.8571	42.8571		100
409B2_d21_VIII.czi	6	6	4	4		100	66.6667	66.6667		100
409B2_d21.czi	13	12	5	5		92.3077	38.4615	38.4615		100
	108	98	46	41		90.7407	42.5926	37.963		89.1304
					av	91.0061	46.6992	42.8788		90.5291
					st dev	7.04106	15.812	18.2672		15.3575
d21_SandraA
File name	DAPI	Cux1	Brn2	Brn2+/Cux1
SandraA_d21_I.czi	12	11	7	7		91.6667	58.3333	58.3333		100
SandraA_d21_II.czi	5	5	3	3		100	60	60		100
SandraA_d21_IV.czi	7	6	3	3		85.7143	42.8571	42.8571		100
SandraA_d21_IX.czi	6	6	3	3		100	50	50		100
SandraA_d21_V.czi	7	6	4	3		85.7143	57.1429	42.8571		75
SandraA_d21_VI.czi	15	15	10	10		100	66.6667	66.6667		100
SandraA_d21_VII.czi	8	7	5	5		87.5	62.5	62.5		100	0.0551919
SandraA_d21_VIII.czi	5	5	3	3		100	60	60		100
SandraA_d21.czi	5	4	4	4		80	80	80		100
	70	65	42	41		92.8571	60	58.5714		97.619
					av	92.2884	59.7222	58.1349		97.2222
					st dev	7.89488	10.3369	11.7788		8.33333
Tukey post-hoc test for pairwise comparison
CUX1	p adj
Human-Ape	0.38

## Sheet: peripherin
409B2
file name	DAPI	PRPH positive
409B2_d21_per488_TuJI555_axon647_2020_09_28__21_24_46.lsm	15	2
409B2_d21_per488_TuJI555_axon647_2020_09_28__21_24_46.lsm	9	1
409B2_d21_per488_TuJI555_axon647_2020_09_28__21_26_12.lsm	2	0
409B2_d21_per488_TuJI555_axon647_2020_09_28__21_27_37.lsm	10	1
409B2_d21_per488_TuJI555_axon647_2020_09_28__21_29_16.lsm	3	0
409B2_d21_per_red_TuJI_647_2020_09_28__16_27_43.lsm	7	1
409B2_d21_per_red_TuJI_647_2020_09_28__16_27_43.lsm	4	1
409B2_d21_per_red_TuJI_647_2020_09_28__16_37_49.lsm	6	1
409B2_d21_per555_TuJI647_2020_09_28__22_12_30.lsm	6	0
409B2_d21_per555_TuJI647_2020_09_28__22_13_28.lsm	9	0
409B2_d21_periph__2020_10_15__11_01_01.czi	25	3
409B2_d21_periph__2020_10_15__11_01_01.czi	3	0
409B2_d21_periph__2020_10_15__11_01_01.czi	4	2
409B2_d21_periph__2020_10_15__11_07_59.czi	25	4
409B2_d21_periph__2020_10_15__11_07_59.czi	28	4
409B2_d21_periph__2020_10_15__11_07_59.czi	18	3
409B2_d21_periph__2020_10_15__11_16_43.czi	7	1
409B2_d21_periph__2020_10_15__11_16_43.czi	17	2
409B2_d21_periph__2020_10_15__11_21_40.czi	20	2
409B2_d21_periph__2020_10_15__11_21_40.czi	13	2
409B2_d21_periph__2020_10_15__11_21_40.czi	3	0
409B2_d21_periph__2020_10_15__11_21_40.czi	3	0
409B2_d21_periph__2020_10_15__11_21_40.czi	23	6
	260	36		13.8462
SandraA
file name	DAPI	PRPH positive
SandraA_d21_per555_TuJI647_2020_09_28__21_45_02.lsm	9	0
SandraA_d21_per555_TuJI647_2020_09_28__21_45_44.lsm	8	1
SandraA_d21_per555_TuJI647_2020_09_28__21_46_14.lsm	9	1
SandraA_d21_per555_TuJI647_2020_09_28__21_46_53.lsm	12	2
SandraA_d21_per555_TuJI647_2020_09_28__21_48_19.lsm	10	1
SandraA_d21_per555_TuJI647_2020_09_28__21_49_12.lsm	6	1
SandraA_d21_per555_TuJI647_2020_09_28__21_51_59.lsm	6	0
SandraA_d21_per555_TuJI647_2020_09_28__21_51_59.lsm	11	1
SandraA_d21_I.czi	8	2
SandraA_d21_II.czi	9	1
SandraA_d21_IV.czi	10	2
SandraA_d21_V.czi	11	1
SandraA_d21_VI.czi	6	0
SandraA_d21.czi	8	2
	123	15		12.1951
Tukey post-hoc test for pairwise comparison
Species	p adj
Human-Ape	0.6103

## Sheet: Tbr1
HUMAN
d21_409b2
						%
File name	DAPI	Tbr1			DAPI	Tbr1
409B2_d21.czi	13	0			0	0
409B2_d21.czi	11	0				0
409B2_I.czi	8	0				0
409B2_II.czi	10	0				0
409B2.czi	3	0				0
	45					0
d21_H9
H9.czi	4	0				0
H9_I.czi	5	0				0
H9_I.czi	62	0				0
H9_III.czi	8	0				0
H9_IV.czi	9	0				0
	44	0				0
	37	0				0
	43	0				0
	212	0				0
												Tbr1
CHIMPANZEE
												human	chimpanzee
d21_SandraA												0	0
						%						100	100
File name	DAPI	Tbr1			DAPI	Tbr1
SandrA.czi	3	0				0
SandrA_I.czi	23	0				0
SandrA_II.czi	5	0				0
SandrA_III.czi	8	0				0
SandraA_I.czi	21	0				0
SandraA.czi	7	0				0
	67	0				0
												Cux1
d21_JoC												human	chimpanzee
						%
File name	DAPI	Tbr1			DAPI	Tbr1					av	91.0061	92.2884
											neg	8.9939	7.71164
JoC.czi	7	0				0					st dev	7.04106	7.89488
JoC_X.czi	3	0				0
JoC_IV.czi	3	0				0
JoC_II.czi	3	0				0
JoC_I.czi	6	0				0
	22	0				0
												Brn2
											av	46.6992	59.7222
											neg	53.3008	40.2778
											st dev	15.812	10.3369
Peripherin
	Chimpanzee	Human
	13.8	12.19
	86.2	87.81
ISL1 Positivity
d21
chimpanzee	human
57.2619	66.6055	av
42.7381	33.3945
17.1105	14.6877	st ved
5.41081	5.99623	SEM
d35
chimpanzee	human
60.3078	64.7748	av
8.09609	19.4079
2.8624	5.60259	st ved
		SEM
